# Supplementary material
Source: Preprints.org preprint supplement (doi:10.20944/preprints202003.0167.v1)
Supplement: Supplementary file 3 [file supplementary]

## Sheet: PM2.5_XRF
	Na		Mg		Al		Si		P		S		Cl		K		Ca		Ti		V		Cr		Mn		Fe		Ni		Cu		Zn		Rb		Sr		Zr		Ba		Pb
Samples	Concentration ug/m3	Uncertainty ug/m3	Concentration ug/m3	Uncertainty ug/m3	Concentration ug/m3	Uncertainty ug/m3	Concentration ug/m3	Uncertainty ug/m3	Concentration ug/m3	Uncertainty ug/m3	Concentration ug/m3	Uncertainty ug/m3	Concentration ug/m3	Uncertainty ug/m3	Concentration ug/m3	Uncertainty ug/m3	Concentration ug/m3	Uncertainty ug/m3	Concentration ug/m3	Uncertainty ug/m3	Concentration ug/m3	Uncertainty ug/m3	Concentration ug/m3	Uncertainty ug/m3	Concentration ug/m3	Uncertainty ug/m3	Concentration ug/m3	Uncertainty ug/m3	Concentration ug/m3	Uncertainty ug/m3	Concentration ug/m3	Uncertainty ug/m3	Concentration ug/m3	Uncertainty ug/m3	Concentration ug/m3	Uncertainty ug/m3	Concentration ug/m3	Uncertainty ug/m3	Concentration ug/m3	Uncertainty ug/m3	Concentration ug/m3	Uncertainty ug/m3	Concentration ug/m3	Uncertainty ug/m3
T01	0.199865	0.0224162	0.588405	0.0658093	0.722881	0.0809332	3.10633	0.347351	0.0961629	0.010842	3.20851	0.358782	0.0640138	0.00799183	0.33593	0.0375656	1.80064	0.201381	0.050642	0.00567801	0.0199154	0.00224183	0.0040305	0.000470451	0.0195337	0.00219257	0.772077	0.0863382	0.00749198	0.000892535	0.0152448	0.00173206	0.0574701	0.00644283	0.00104319	0.000329544	0.00803728	0.00102731	0.00810841	0.00145497	0.0298257	0.00342517	0.143533	0.0161259
T03	0.219837	0.0246444	0.477482	0.0534063	0.377357	0.0423235	1.73532	0.194068	0.104565	0.0117792	3.85207	0.430763	0.182677	0.020876	0.318785	0.0356488	1.74782	0.19547	0.0426567	0.0047887	0.0222766	0.0025072	0.00694942	0.00079155	0.0332924	0.00372933	0.77399	0.0865525	0.00897784	0.00105114	0.0215084	0.00242808	0.21278	0.0238027	0.000936192	0.00032915	0.00746553	0.000987712	0.0101061	0.00164841	0.0502663	0.0056789	0.185342	0.0207999
T04	0.154646	0.017403	0.261185	0.0292404	0.366758	0.0411569	1.40245	0.156863	0.0787021	0.00897966	8.45028	0.945577	0.0690618	0.00869914	0.303872	0.0339805	0.929034	0.103883	0.0261633	0.0029437	0.0156108	0.00175935	0.00206714	0.000261603	0.0120681	0.00136049	0.367748	0.0411325	0.0052091	0.000647446	0.00711831	0.000844619	0.0647012	0.00725073	0.0014378	0.00036706	0.0048084	0.000730764	0.00252205	0.00125769	0.0176308	0.00207137	0.0229577	0.00278636
T05	0.215834	0.0241872	0.412395	0.0461297	0.385692	0.043244	2.03899	0.228014	0.0933462	0.0105087	2.564	0.286702	0.251477	0.0283918	0.35179	0.0393386	1.545	0.17278	0.0374081	0.00420556	0.0128177	0.00145565	0.00386388	0.000451816	0.0189154	0.00212315	0.571339	0.0638953	0.00536392	0.000671393	0.0133285	0.00152522	0.164842	0.018444	0.00155577	0.000368695	0.00527104	0.000779914	0.00664105	0.00141748	0.0685932	0.00770948	0.157876	0.0177301
T06	0.22075	0.0247185	0.130993	0.014672	0.0880402	0.010008	0.433127	0.0484795	0.0729648	0.008198	1.40148	0.156708	0.387089	0.0434175	0.0673521	0.00753823	0.428744	0.0479412	0.00732895	0.000851592	0.00519057	0.000601371	0.000827986	0.000134381	0.00249323	0.000304652	0.0956706	0.0107204	0.00157712	0.000310126	0.00139157	0.000298819	0.0155392	0.00177183	0	0	0.00190182	0.000489282	0	0	0.0192501	0.00219687	0.0108775	0.00155816
T07	0.129906	0.0146044	0.290548	0.0325112	0.397141	0.0445203	1.58114	0.176832	0.0845084	0.00954364	3.99576	0.446843	0.138953	0.0159726	0.313769	0.0350871	1.09903	0.122895	0.0283241	0.00318841	0.0156119	0.00176081	0.00275354	0.000333246	0.0116822	0.00131735	0.435996	0.0487628	0.00538181	0.000673046	0.0248445	0.00279941	0.0611021	0.00684877	0.00155423	0.000368331	0.00707523	0.000941375	0.00786394	0.00149268	0.0374639	0.00424601	0.0265379	0.00316101
T08	0.155856	0.017479	0.46389	0.0518827	0.308286	0.034595	1.58779	0.177568	0.097327	0.0109217	1.06614	0.119214	0.470193	0.0527123	0.231351	0.0258733	1.75052	0.195777	0.0300293	0.00337481	0.0066841	0.000772679	0.00366518	0.000427279	0.0134824	0.00151707	0.542903	0.0607147	0.00406481	0.000542829	0.0163734	0.00185831	0.0571357	0.00640594	0.000844932	0.000333368	0.0104132	0.00127722	0.00582318	0.00141469	0.0323358	0.00367136	0.0178349	0.00225378
T09	0.320906	0.0359227	0.389466	0.0435667	0.410855	0.0460465	1.82414	0.203992	0.0863801	0.00971475	1.91587	0.214226	0.285722	0.0321537	0.291281	0.0325732	1.21646	0.13603	0.0318207	0.00357417	0.00647165	0.000750425	0.00305396	0.000360092	0.0162558	0.00182553	0.545183	0.0609697	0.00388894	0.000514204	0.0138858	0.00158071	0.0835435	0.00935526	0.00130394	0.000351885	0.00796088	0.00101142	0.00693146	0.00140061	0.0303795	0.0034564	0.0157616	0.00202941
T10	0.139496	0.0156664	0.180369	0.0201974	0.0905067	0.0103813	0.500653	0.0560514	0.105774	0.0118707	1.41274	0.15797	0.400355	0.0449876	0.242532	0.0271252	0.636027	0.0711194	0.0155568	0.00178174	0.0077591	0.000899641	0.00331751	0.000400611	0.0130156	0.00147063	0.387407	0.0433378	0.00312425	0.000497532	0.0157501	0.00180283	0.101168	0.0113331	0.0014816	0.000420507	0.00302763	0.000699346	0.00859975	0.00182061	0.0348499	0.00396025	0.0136565	0.00203991
T11	0.151408	0.0169981	0.0683133	0.00770156	0.138837	0.0156923	0.395789	0.0443367	0.0647445	0.00739644	7.26994	0.813348	0.257873	0.0291274	0.146964	0.0164376	0.26158	0.0292518	0.0125943	0.00143494	0.0251656	0.00282301	0.0014137	0.000199682	0.0130088	0.00146437	0.238095	0.0266382	0.00642379	0.000778077	0.00778223	0.000912895	0.0826574	0.00925655	0.000920974	0.000338387	0.00297014	0.000586562	0.00345365	0.0012361	0.0161401	0.00188723	0.0109135	0.00157131
T12	0.136261	0.0153004	0.282525	0.0316133	0.437876	0.0490608	1.88632	0.210948	0.0810746	0.00913076	2.14085	0.239384	0.157709	0.0179635	0.315806	0.0353151	0.984019	0.110033	0.0371954	0.00417674	0.0302141	0.00338919	0.00294817	0.000353662	0.0213055	0.00238942	0.533577	0.0596719	0.0078511	0.000926844	0.0149468	0.00169739	0.0905051	0.0101337	0.00169382	0.000352714	0.0061115	0.000835424	0.0067524	0.00137104	0.0376303	0.00427447	0.0251327	0.00300071
T13	0.152632	0.0171299	0.165027	0.018482	0.20198	0.0227227	0.798738	0.0893594	0.0749161	0.00847392	4.16147	0.465383	0.0952518	0.0111237	0.172234	0.019263	0.644086	0.0720194	0.0207947	0.00234118	0.00952518	0.00108066	0.0018752	0.000234738	0.0117883	0.00132718	0.296772	0.033197	0.00341988	0.000471227	0.00778081	0.000912481	0.0677779	0.00759312	0.000711519	0.000308801	0.00527901	0.000747711	0.00316741	0.00117909	0.0116368	0.00140405	0.0155157	0.00199582
T14	0.110394	0.0124057	0.16591	0.0185739	0.119969	0.0135787	0.552654	0.0618489	0.0785087	0.00883967	2.56541	0.28686	0.0957479	0.0111057	0.224837	0.0251441	0.645127	0.0721358	0.0157836	0.00178926	0.0117422	0.00132799	0.00447809	0.000514444	0.0194657	0.00218337	0.368459	0.0412127	0.00516265	0.000648519	0.0150104	0.00170815	0.0760525	0.008519	0.00115989	0.000343797	0.00334322	0.00060648	0.00498071	0.00132779	0.0275417	0.00313131	0.0150331	0.00196783
T15	0.292065	0.0326961	0.212851	0.0238226	0.141006	0.0159282	0.673192	0.0753232	0.0806011	0.00908012	2.89814	0.324071	0.143281	0.0163785	0.262931	0.0294032	0.867053	0.0969524	0.0152605	0.00172787	0.0112259	0.0012699	0.00228567	0.000278788	0.00967713	0.00109261	0.255495	0.028586	0.00450311	0.000595696	0.00786907	0.000928139	0.124495	0.0139346	0.00159201	0.000364775	0.00318402	0.000595675	0.00329773	0.00123877	0.0214239	0.00245667	0.00977948	0.00148218
T16	0.0902179	0.010219	0.430487	0.0481611	1.3058	0.146087	5.20386	0.581874	0.102283	0.0115461	4.15348	0.464491	0.220366	0.0249761	0.584174	0.0653208	1.50192	0.167963	0.106427	0.0119147	0.020443	0.00230771	0.00376534	0.000446227	0.0237895	0.00266798	1.12036	0.125279	0.00614656	0.000748222	0.0107679	0.00123973	0.100576	0.0112591	0.0023448	0.000412677	0.0100622	0.00124086	0.00721652	0.00145146	0.0931773	0.01047	0.0161404	0.00207506
T17	0.162961	0.0182738	0.087652	0.00983967	0.0771011	0.00884331	0.317889	0.0356134	0.0724723	0.00818487	3.93266	0.439786	0.211472	0.0239204	0.275118	0.0307654	0.400345	0.0447662	0.010619	0.00121806	0.0286123	0.00320867	0.0021896	0.000272748	0.00890815	0.0010075	0.221161	0.0247449	0.00707933	0.000844671	0.0101198	0.00116925	0.128653	0.0143969	0	0	0.00113451	0.000471196	0.0041523	0.00128907	0.0171084	0.00198878	0.0153839	0.00201189
T18	0.240225	0.0269267	0.0864765	0.00974418	0.234846	0.0264247	0.836382	0.0935821	0.0674325	0.00772711	8.3359	0.932801	0.145348	0.0167646	0.370558	0.0414361	0.47411	0.053014	0.0161142	0.00182244	0.0197513	0.00221895	0.0011193	0.000168047	0.00903677	0.00102226	0.230268	0.0257628	0.00460079	0.000583126	0.00913291	0.00105739	0.101309	0.0113411	0.00208294	0.00041487	0.00771376	0.000998678	0.00276963	0.00122987	0.00764509	0.00101606	0.0175334	0.00221443
T19	0.183694	0.0206123	0.372279	0.0416491	0.525169	0.0588316	2.44586	0.273509	0.0905662	0.010243	4.99441	0.558579	0.156905	0.0180274	0.345167	0.0385982	1.62036	0.181213	0.0412797	0.00463186	0.021136	0.00237666	0.00444178	0.000514929	0.0205637	0.00230764	0.634933	0.0710045	0.00779908	0.000922117	0.0136599	0.00155641	0.0922045	0.0103236	0.00154597	0.000366373	0.00826056	0.00105387	0.00978346	0.00160663	0.0267891	0.00308479	0.0449716	0.00515865
T20	0.181011	0.0203077	0.344768	0.038572	0.427755	0.0479498	1.96693	0.219964	0.0859899	0.00971665	4.24314	0.474518	0.130498	0.0150508	0.328369	0.0367196	1.3878	0.155195	0.0372322	0.00418117	0.0274853	0.00308543	0.00310654	0.000369824	0.0143155	0.00161012	0.535826	0.0599235	0.0075527	0.00088874	0.0153133	0.00173436	0.0356617	0.00400638	0.00124723	0.000352143	0.0154287	0.00180493	0.00889232	0.00155914	0.0293562	0.00336431	0.0139736	0.00186375
T21	0.29489	0.0330281	0.822135	0.0919427	1.5458	0.172923	6.20192	0.693467	0.123844	0.0139087	1.42965	0.159859	1.4883	0.166523	0.461524	0.0516082	2.74494	0.307114	0.120242	0.0134559	0.0125161	0.00142651	0.00567149	0.000650054	0.0250183	0.00280501	1.2696	0.141966	0.00602711	0.000737697	0.00720482	0.000851855	0.110405	0.0123582	0.00196285	0.000390741	0.0197671	0.00228419	0.00669679	0.00143475	0.0287269	0.00334195	0.0227229	0.00275363
T22	0.152101	0.0170773	0.363465	0.0406642	0.654265	0.0732567	2.6787	0.299538	0.088146	0.00993835	2.76977	0.309715	0.127724	0.0147033	0.30049	0.0336029	1.12245	0.125515	0.0519536	0.00582551	0.0358421	0.00401875	0.00317092	0.00037868	0.0230417	0.0025836	0.6888	0.0770267	0.00973692	0.00113015	0.00985367	0.00113675	0.0714041	0.00799827	0.00100405	0.000323641	0.00649128	0.000863016	0.00481009	0.00124314	0.027156	0.0031442	0.0216454	0.00262908
T23	0.145963	0.0163767	0.16929	0.0189587	0.312345	0.0350326	1.24892	0.139683	0.07747	0.00873012	2.46527	0.275662	0.162568	0.018465	0.158824	0.0177638	0.744396	0.083236	0.0253039	0.00284774	0.0215665	0.00242217	0.00283506	0.000338436	0.0192315	0.00215739	0.389653	0.0435814	0.0065353	0.000790752	0.00679113	0.000808939	0.0583758	0.00654317	0	0	0.00509335	0.00075021	0.00453517	0.00128995	0.0173965	0.00204384	0.0117217	0.00164851
T24	0.118863	0.0133525	0.160909	0.0180204	0.249639	0.0280267	1.0514	0.117602	0.0750772	0.00846133	2.43149	0.271882	0.114273	0.0131267	0.316395	0.0353807	0.584091	0.0653111	0.0217188	0.00244983	0.0307355	0.00344578	0.00223447	0.000276378	0.00939913	0.00106127	0.293378	0.0328204	0.00801998	0.000953575	0.00857628	0.00100509	0.0685638	0.00768419	0	0	0.00394045	0.000691597	0.00329144	0.0013715	0.0177784	0.00208388	0.0158777	0.00208281
T25	0.130858	0.014714	0.107585	0.0120813	0.27674	0.0310851	1.00373	0.112281	0.0688278	0.00784402	6.19035	0.692444	0.139637	0.0160413	0.203165	0.0227208	0.501565	0.0560838	0.022259	0.00250945	0.0144246	0.00162629	0.00200469	0.000250964	0.00968244	0.00109348	0.306995	0.0343417	0.00423981	0.000560742	0.00944741	0.00109791	0.0489652	0.00549384	0.00149776	0.000363467	0.00218903	0.000542263	0	0	0.0169362	0.00198604	0.0161528	0.00208245
T26	0.15209	0.0171114	0.301054	0.0336974	0.723128	0.0809571	2.86848	0.320761	0.0860522	0.0097829	7.13214	0.7979	0.0942399	0.0112579	0.306	0.0342192	1.56942	0.175512	0.0613026	0.0068697	0.0265924	0.00298627	0.00335904	0.000398395	0.0205578	0.00230677	0.674958	0.07548	0.00846759	0.00100145	0.0112668	0.00129565	0.053978	0.00605293	0.0013996	0.000362128	0.0101238	0.00124278	0.00632154	0.00140387	0.0253095	0.00295166	0.0165386	0.00212625
T27	0.191496	0.0214744	0.503652	0.056332	0.454905	0.0509812	2.26281	0.253044	0.107097	0.012048	3.01943	0.337634	0.187397	0.0213267	0.288075	0.0322157	2.80458	0.313789	0.0353243	0.0039694	0.0426327	0.0047762	0.00310376	0.00037352	0.0136495	0.00153614	0.525694	0.0587927	0.0132583	0.0015234	0.00674628	0.00081341	0.0911216	0.0102045	0.000655888	0.000336043	0.0360504	0.00408358	0	0	0.0391659	0.00445072	0.0100023	0.00150504
T28	0.179926	0.0201824	0.137561	0.0154187	0.171514	0.0193464	0.792087	0.0886181	0.0742683	0.00843224	5.80817	0.649653	0.102302	0.0120302	0.21642	0.024203	0.569258	0.0636525	0.018736	0.00212001	0.0303878	0.00340711	0.0024259	0.000298994	0.0111018	0.00125159	0.288567	0.0322815	0.00748043	0.000897719	0.00946123	0.00110032	0.0632457	0.00708965	0.00165455	0.000395482	0.00251678	0.000584821	0	0	0.0305975	0.00348258	0.0249814	0.00300866
T29	0.188006	0.021077	0.185317	0.0207489	0.187056	0.0210683	0.932264	0.104288	0.0713222	0.00807902	4.11244	0.459895	0.0850674	0.0100492	0.204556	0.0228769	0.639535	0.0715107	0.0160863	0.00182755	0.0232023	0.00260443	0.00191691	0.000242553	0.00785309	0.000889685	0.29354	0.0328362	0.00658287	0.000786794	0.00706963	0.000830516	0.0582955	0.0065341	0.00104306	0.000323108	0.00380138	0.000628919	0.003106	0.00118768	0.03507	0.00397058	0.0057716	0.00114871
T30	0.144481	0.0162409	0.268712	0.0300725	0.311455	0.0349753	1.41815	0.15861	0.0887601	0.0100466	5.97634	0.668476	0.0785653	0.0095474	0.189773	0.0212241	1.24009	0.138672	0.0283162	0.00319071	0.0442397	0.00495698	0.00312157	0.000375279	0.012851	0.00144689	0.393738	0.0440382	0.0122291	0.00140063	0.0133982	0.00152402	0.128604	0.0143912	0.00105221	0.000325943	0.00972713	0.00119324	0.00453621	0.00123163	0.049267	0.00556529	0.0115276	0.00162035
T31	0.20255	0.022869	0.287103	0.0321831	0.347398	0.0392142	1.42471	0.159442	0.157329	0.0178574	11.0265	1.23317	0.152898	0.0184812	0.231292	0.0258756	1.02561	0.114682	0.0360364	0.00408083	0.0429844	0.00483144	0.0044951	0.000568031	0.0157383	0.00179221	0.471067	0.0527113	0.0135609	0.00164896	0.0160462	0.00190758	0.103895	0.0116611	0.00162083	0.00072536	0.00788804	0.00139476	0.00723971	0.00282004	0.0327948	0.00387142	0.0101572	0.00248926
T32	0.124094	0.0139924	0.531939	0.0595011	1.06182	0.118821	4.5014	0.503331	0.0976323	0.0110393	4.69008	0.524516	0.173866	0.0199085	0.392512	0.0438916	2.16919	0.242628	0.0838043	0.00938433	0.0188434	0.00212616	0.00404811	0.00047402	0.021086	0.00236642	0.944583	0.105626	0.00644832	0.000784955	0.0111532	0.00127948	0.0557183	0.00624778	0.00171955	0.000365178	0.0159059	0.00186123	0.0075708	0.00148325	0.0309997	0.00357675	0.0073081	0.00129374
T33	0.163836	0.0184137	0.5577	0.0623813	1.18026	0.132061	5.12413	0.572957	0.0933825	0.0105546	3.56768	0.398954	1.05121	0.117692	0.347696	0.0388823	1.79229	0.200447	0.0832394	0.00932119	0.0218099	0.0024551	0.00445483	0.00051881	0.0232075	0.00260332	0.989897	0.110693	0.00764298	0.000917226	0.139621	0.0156224	0.213694	0.0239055	0.00471436	0.000650342	0.00995254	0.00124019	0.00595248	0.00136388	0.023929	0.00282419	0.140955	0.0158398
T34	0.210827	0.0236502	0.723278	0.0808914	1.27469	0.14262	5.71321	0.638824	0.111255	0.0125379	3.38511	0.378532	0.310208	0.0349769	0.464907	0.0519863	3.38081	0.378365	0.0999056	0.0111832	0.0164761	0.00186417	0.0048236	0.00055919	0.0285983	0.00320523	1.12044	0.12529	0.00624708	0.000774116	0.012518	0.00143347	0.0713884	0.00799868	0.00193135	0.000397565	0.0422751	0.00477681	0.00851224	0.00160111	0.0331906	0.00382556	0.00734389	0.00131353
T35	0.176374	0.0198163	1.37907	0.15421	1.48348	0.165974	7.34381	0.821149	0.164021	0.0184079	2.1453	0.239881	1.06034	0.118713	0.525418	0.0587531	7.20045	0.808578	0.119008	0.0133189	0.0160796	0.00182439	0.0108089	0.001221	0.0349785	0.003918	1.52481	0.170507	0.011779	0.00137814	0.0110383	0.0012851	0.0873506	0.00978738	0.00236535	0.000445395	0.0800156	0.00898503	0.00611645	0.00156677	0.040641	0.00465329	0.0175131	0.00225718
T36	0.241956	0.0271015	0.0980566	0.0110096	0.12039	0.0136402	0.41188	0.0461221	0	0	4.76224	0.532594	0.0705274	0.00845675	0.120555	0.0134851	0.295839	0.0330817	0.00895933	0.00102477	0.00795784	0.000903961	0.00131651	0.000179902	0.00489695	0.000565374	0.125915	0.0140991	0.00319724	0.000441196	0.00366742	0.000484767	0.0213698	0.0024151	0.000846328	0.000319931	0.00197477	0.00051944	0	0	0.00343233	0.000571252	0.00966225	0.00147949
T37	0.176711	0.0198341	0.644065	0.072032	0.798133	0.0893501	3.55817	0.397872	0.104301	0.0117466	2.88751	0.322881	0.265725	0.0299869	0.292537	0.0327142	2.56979	0.287481	0.0584643	0.00655234	0.0206542	0.0023242	0.00383133	0.000449601	0.0179969	0.00202169	0.732313	0.0818926	0.00838627	0.000988	0.0124117	0.0014222	0.0651014	0.00729593	0.00153349	0.000376725	0.0350306	0.00397359	0.00452858	0.00136713	0.0243202	0.0028385	0.0165808	0.00214456
T38	0.239416	0.0268431	0.73756	0.0824891	1.49467	0.167209	6.34601	0.709579	0.0991736	0.0111968	3.24333	0.362676	0.276507	0.0312138	0.492274	0.0550458	2.21953	0.248263	0.114173	0.012779	0.0258776	0.00290993	0.00574339	0.000661317	0.0307632	0.00344728	1.25746	0.14061	0.0089134	0.00105149	0.0178508	0.00202377	0.149323	0.0167093	0.00170121	0.000385621	0.0134899	0.00161413	0.00848211	0.00162359	0.0324429	0.00376424	0.0233138	0.00283944
T39	0.233893	0.0262226	0.886667	0.0991543	0.970773	0.108659	5.07124	0.567046	0.165978	0.0186318	3.65561	0.408791	1.04245	0.116722	0.363282	0.0406253	6.74206	0.756796	0.107018	0.0119782	0.0168728	0.0019074	0.0148072	0.00166561	0.0292571	0.00327948	1.39851	0.156382	0.0144288	0.00165125	0.0126428	0.00144615	0.118955	0.0133148	0.00164498	0.000356584	0.0504304	0.00567932	0.00648592	0.00142095	0.037341	0.00428459	0.0106219	0.00154416
T40	0.203989	0.0228756	0.504125	0.0563924	1.28314	0.143557	5.12059	0.572562	0.108683	0.012225	2.10845	0.235758	0.42308	0.0474982	0.386813	0.0432546	2.32567	0.260146	0.0953549	0.010674	0.0135913	0.00154226	0.00581286	0.000665108	0.0212331	0.00238266	0.973732	0.108885	0.00776646	0.00092254	0.0222447	0.00250957	0.0628987	0.00704862	0.00167794	0.000384464	0.020351	0.00234691	0.00453044	0.00130116	0.0183854	0.00222934	0.00776646	0.00132949
T41	0.223271	0.0250467	0.490147	0.0548343	1.306	0.14612	5.0283	0.562245	0.104774	0.011839	4.91741	0.549949	0.108712	0.0128295	0.483382	0.054052	2.11626	0.236702	0.0985657	0.011034	0.026864	0.00301986	0.00766541	0.000871725	0.0302582	0.00339075	1.15431	0.129075	0.00983241	0.00114328	0.0159444	0.0018101	0.172925	0.0193472	0.00205345	0.000389025	0.0135045	0.00160066	0.00724748	0.00145452	0.030536	0.00354816	0.0205104	0.00252751
T42	0.15902	0.0178562	0.528097	0.0590707	1.23875	0.138597	5.01774	0.56106	0.0949795	0.0106952	1.83781	0.205495	0.237269	0.0267714	0.37725	0.0421852	1.87062	0.209212	0.0871427	0.00975592	0.0129332	0.00146995	0.00338955	0.00040058	0.017479	0.00196342	0.884384	0.098895	0.00403861	0.000535814	0.00233182	0.000354621	0.00567329	0.00069681	0.00165872	0.00034294	0.0113706	0.00136784	0.00475979	0.0012272	0.0175487	0.00212545	0	0
T43	0.159469	0.0179191	0.478305	0.0535071	1.1282	0.126248	4.98308	0.55719	0.0979189	0.011052	3.18407	0.356044	0.200535	0.0227818	0.392736	0.0439171	1.89208	0.211607	0.0837248	0.00937434	0.0200535	0.0022592	0.00337172	0.000401749	0.0176896	0.00198779	0.865712	0.0968083	0.00606153	0.000753046	0.00495025	0.00061927	0.0198262	0.00224878	0.00159115	0.000373429	0.0143204	0.00169474	0.00573319	0.00139371	0.0231601	0.00273611	0.00378845	0.00111879
T44	0.205768	0.0230647	0.185598	0.0207836	0.218688	0.0245914	0.922846	0.10324	0.07099	0.00804923	4.44387	0.496969	0.065798	0.00808318	0.182224	0.0203802	0.541984	0.060603	0.0151694	0.00171629	0.0156791	0.00176418	0.00115565	0.000168187	0.0041369	0.000483582	0.192106	0.0214994	0.00392395	0.000537788	0.00715403	0.000849817	0.0093792	0.00110083	0.000813502	0.000370243	0.00275155	0.000609687	0	0	0.00342149	0.000631503	0.00890067	0.00146613
T45	0.214494	0.0240543	0.763131	0.0853439	0.875162	0.0979671	4.11265	0.459865	0.104508	0.0117723	2.90787	0.325158	0.439893	0.0493986	0.367154	0.0410568	2.54766	0.284997	0.064073	0.00718011	0.0358098	0.00401615	0.00851548	0.00096593	0.0399483	0.00447298	0.972318	0.10873	0.0148254	0.00170841	0.0118068	0.00136961	0.147232	0.0164783	0.00206923	0.000432275	0.0225181	0.00260198	0.00399239	0.00145763	0.027046	0.00315514	0.0380251	0.00442891
T46	0.207869	0.0233173	0.766705	0.0857422	0.684082	0.0766072	3.23847	0.362126	0.104359	0.0117581	3.46092	0.387011	0.417969	0.0469571	0.28615	0.0320004	2.59267	0.290039	0.0522765	0.00586098	0.0144215	0.00163016	0.00804645	0.00091171	0.0213958	0.00240058	0.746377	0.0834651	0.00710766	0.000854948	0.0113528	0.00130224	0.0658368	0.00737839	0.00128569	0.000368783	0.0276059	0.00315021	0.00713192	0.00149231	0.0224874	0.00262422	0.0203527	0.00252379
T47	0.229838	0.0258024	0.403	0.0450947	0.514019	0.0576174	2.25463	0.252133	0.0807119	0.00923094	9.00395	1.00759	0.10013	0.0120193	0.212583	0.0237753	1.41604	0.158352	0.0372086	0.00417819	0.0171631	0.00193362	0.00294801	0.000354765	0.0127302	0.0014349	0.498027	0.0556992	0.00580853	0.000722191	0.00780142	0.000919691	0.0873467	0.00978165	0	0	0.0190782	0.00221786	0.00257617	0.00129619	0.0139259	0.00170906	0.0207795	0.00257821
T48	0.148593	0.0168287	0.427676	0.0478719	0.994771	0.111337	3.73582	0.417742	0.0856913	0.00984005	11.4327	1.28005	0.132978	0.0157256	0.427042	0.0477524	1.87843	0.210083	0.0737111	0.00825559	0.0202517	0.00228006	0.00306459	0.000371645	0.0185998	0.00208984	0.791279	0.0884856	0.00629509	0.000771988	0.0110042	0.00127054	0.0526787	0.00590984	0.00158597	0.000406685	0.0146885	0.00174351	0.00456272	0.00143566	0.0161769	0.00200011	0.0107846	0.00163077
T49	0.513704	0.057486	0.607447	0.0679417	0.713709	0.0799164	3.13773	0.350864	0.10076	0.011391	5.25881	0.588148	0.226411	0.0257363	0.317294	0.0354823	2.4527	0.274363	0.055038	0.00616916	0.0229101	0.00257551	0.00453801	0.000526158	0.0198611	0.00222935	0.727866	0.0813957	0.00787305	0.000935865	0.00919338	0.00106891	0.0709553	0.00794964	0.00156483	0.000384425	0.0342551	0.00388632	0.00305631	0.00129294	0.0297318	0.00342649	0.0268711	0.00320791
T50	0.217805	0.024476	0.320591	0.0358935	0.577937	0.0647677	2.68914	0.30072	0.0772309	0.0089279	12.6137	1.41266	0.050813	0.00736472	0.248762	0.0278199	1.68159	0.188058	0.0586817	0.00657753	0.0328805	0.00368805	0.0060581	0.000694914	0.0199848	0.00224442	0.736172	0.0823245	0.0121606	0.00140277	0.0130239	0.00149101	0.160628	0.0179721	0.00172666	0.00037429	0.0218792	0.0025111	0.00360131	0.00125058	0.0171186	0.00209962	0.0111493	0.00160518
T51	0.329841	0.0369301	0.412153	0.0461098	0.719029	0.0804992	2.95209	0.330109	0.0948921	0.0106926	2.94198	0.328971	0.196346	0.0222617	0.314498	0.0351694	1.64708	0.184197	0.0496044	0.00555996	0.0139317	0.00157441	0.00293532	0.000350588	0.0108089	0.0012204	0.539457	0.0603322	0.00471131	0.000616669	0.00192399	0.000346255	0.00957061	0.00112437	0.00118399	0.000346913	0.00828795	0.00106158	0	0	0.0115686	0.00147804	0.00369998	0.00109266
T52	0.217115	0.0243446	0.300216	0.0336023	0.763429	0.0854569	2.79768	0.312848	0.0891202	0.0100769	4.23697	0.473816	0.159346	0.0182473	0.305273	0.0341377	1.20632	0.134893	0.0532797	0.00597338	0.0197826	0.00222834	0.00201772	0.000258293	0.0123333	0.00138967	0.591627	0.0661634	0.00520464	0.000652854	0.00616663	0.00074092	0.0372465	0.00418534	0.00113466	0.000344847	0.00897862	0.00111851	0	0	0.0253325	0.0029402	0.00717796	0.00127182
T53	0.191536	0.0215051	0.382183	0.0427595	0.450904	0.0505669	2.14278	0.239627	0.0980248	0.0111105	7.11309	0.795715	0.133446	0.0155663	0.333023	0.0372407	1.91188	0.213825	0.0381591	0.00428936	0.0249379	0.00280381	0.00342371	0.000410398	0.0172567	0.00193993	0.576062	0.0644231	0.00816462	0.000967517	0.0126046	0.00144526	0.139884	0.0156537	0.00172666	0.000395627	0.0128019	0.00153964	0.00550064	0.00061499	0.061321	0.00691004	0.0467431	0.00536959
T54	0.296202	0.0331712	0.321799	0.0360081	0.410096	0.0459774	1.92738	0.215543	0.0777936	0.00881221	4.18303	0.467783	0.0981885	0.011573	0.316353	0.0353766	0.979125	0.109485	0.123004	0.0137648	0.0163403	0.00185027	0.00200529	0.00025648	0.00987503	0.00111648	0.373947	0.0418287	0.00483615	0.000639753	0.00383472	0.000519347	0.0552738	0.00620105	0.0017586	0.000394447	0.00613067	0.000870953	0.00393242	0.000439658	0.0250601	0.00295153	0.0122613	0.00174191
T55	0.150019	0.0169286	0.403621	0.0451695	0.779242	0.0872451	3.22526	0.360653	0.0870947	0.00994074	8.89263	0.995102	0.15219	0.0176351	0.399962	0.0447248	1.76243	0.197103	0.0541445	0.00606944	0.0175116	0.00197615	0.00364622	0.000430712	0.0193628	0.0021745	0.686538	0.0767764	0.00568274	0.000721289	0.00709732	0.000854505	0.0667539	0.00748258	0.00180482	0.000396619	0.00675587	0.000926514	0.00434132	0.000485374	0.023926	0.00279347	0.0138532	0.00189828
T56	0.399075	0.0446848	1.07764	0.120511	1.82461	0.204107	7.70635	0.861689	0.109417	0.0123546	3.68648	0.41224	0.678121	0.0760284	0.76686	0.0857483	3.75706	0.420535	0.113958	0.0127558	0.0323021	0.00362797	0.00672939	0.000770855	0.0343009	0.00384289	1.46381	0.163683	0.0121657	0.00140336	0.00700824	0.000837635	0.0277615	0.00313205	0.00330671	0.000505997	0.0278356	0.00317756	0.0068355	0.000764233	0.0373608	0.00430974	0.0402234	0.00465683
T57	0.175036	0.0197908	0.579439	0.0648399	1.18273	0.132354	4.90889	0.5489	0.0812002	0.00937405	11.7378	1.31428	0.0944017	0.0117494	0.560682	0.0626946	2.2001	0.246083	0.0795285	0.00890653	0.0340239	0.00381739	0.00714159	0.000816273	0.0267521	0.00300027	1.01057	0.113005	0.0121198	0.00140431	0.00695721	0.000831903	0.0526093	0.00590241	0.00204045	0.000412914	0.0184378	0.00214419	0.00410549	0.000459008	0.0215108	0.00258905	0.0224696	0.00274497
T58	0.646722	0.0723569	1.25417	0.140244	1.15041	0.128746	5.83754	0.652727	0.16509	0.0185273	2.46313	0.275422	4.31214	0.482242	0.38003	0.0424999	6.65076	0.746197	0.0913266	0.0102238	0.0137842	0.0015649	0.00716878	0.000815537	0.0283738	0.00317989	1.18273	0.132253	0.00951062	0.00111815	0.00775671	0.000916491	0.0413033	0.0046392	0.00187742	0.000383651	0.0430325	0.00486064	0.00523702	0.000585516	0.0294706	0.00341281	0.0181566	0.00230265
T59	0.238244	0.0268018	0.705322	0.0789048	0.97279	0.108898	4.4095	0.493064	0.115531	0.0131249	11.2463	1.25907	0.377922	0.0427042	0.41294	0.0461767	3.95208	0.442412	0.0780362	0.00874171	0.0399963	0.00448515	0.0121846	0.00137359	0.0373464	0.00418279	1.07752	0.12049	0.0163205	0.00186212	0.0128038	0.00146726	0.0930193	0.0104155	0.00205554	0.000415967	0.0393029	0.00444858	0.0066124	0.000739288	0.0319475	0.00370667	0.0208773	0.00258656
T60	0.141456	0.0159749	0.284124	0.0318147	0.492977	0.0552588	2.09943	0.234787	0.0798272	0.00917546	11.0116	1.23273	0.080471	0.0100403	0.287517	0.032153	1.3684	0.153022	0.0385765	0.00433115	0.0286724	0.00321722	0.00244879	0.000301502	0.0127837	0.00143974	0.485574	0.0543061	0.00846802	0.000992283	0.00794805	0.000929423	0.0670509	0.00751286	0.00118849	0.000348232	0.0141629	0.00167454	0.00267411	0.000298975	0.0141134	0.00174402	0.0213186	0.00262068
T61	0.260476	0.0291805	0.178209	0.0199638	0.273978	0.0307735	1.07476	0.120227	0.0843085	0.00954079	5.27863	0.590364	0.156418	0.0179254	0.234013	0.0261702	0.881181	0.0985316	0.0573042	0.00642043	0.0166035	0.00187128	0.00200442	0.000245742	0.00795865	0.000900027	0.26628	0.0297907	0.00573042	0.000716027	0.00843577	0.000988245	0.0693799	0.00777409	0.000934575	0.000359822	0.00491882	0.000754441	0.00354155	0.000395957	0.0108952	0.00141156	0.00860793	0.00141181
T62	0.112689	0.0127714	0.770645	0.0861903	1.39084	0.155613	5.9604	0.666465	0.108532	0.012285	6.14415	0.687234	0.347833	0.0392306	0.498873	0.0557843	2.91695	0.326357	0.102259	0.0114457	0.0128654	0.00146363	0.00569964	0.000653017	0.0284146	0.00318455	1.19983	0.134165	0.00740437	0.000887454	0.00934771	0.00108599	0.0939445	0.0105185	0.00221393	0.000404394	0.0144644	0.00169767	0.00600222	0.000671068	0.0240827	0.0028422	0.0199992	0.00246313
T63	0.254868	0.0285517	0.164362	0.0184157	0.19995	0.0225182	0.823656	0.0921519	0.0750366	0.00851391	5.26067	0.588355	0.107476	0.0125697	0.29294	0.0327586	0.566746	0.0633717	0.0157894	0.00178592	0.0232931	0.00261405	0.00256516	0.000308301	0.00850709	0.000961759	0.223831	0.0250444	0.00646824	0.000781075	0.010182	0.00117601	0.0593947	0.00665872	0.000737823	0.000330193	0.0025086	0.000544996	0	0	0.00737823	0.000986526	0.0138219	0.00187255
T64	0.112773	0.0127364	0.201677	0.0225891	0.292977	0.0329126	1.26989	0.142041	0.0795751	0.00906298	7.54557	0.84415	0.115759	0.0135314	0.219473	0.0245451	0.974425	0.108959	0.021276	0.0023971	0.0118005	0.00133367	0.0022436	0.000272371	0.00941869	0.0010634	0.289422	0.0323784	0.00434405	0.0005821	0.00955197	0.0011151	0.0514869	0.00577754	0.00123411	0.000372078	0.00518324	0.000777486	0	0	0.0101443	0.00126831	0.0199925	0.00249598
T65	0.19819	0.0224248	1.88958	0.21131	3.74986	0.419396	19.0991	2.13599	0.169877	0.0192213	6.21973	0.6957	0.80581	0.0904803	1.52818	0.170891	10.7998	1.21864	0.338179	0.0378226	0.0387025	0.00435228	0.0219117	0.00246214	0.0891241	0.00997123	4.22576	0.472625	0.0250138	0.00283548	0.0135656	0.00156099	0.299698	0.0335226	0.00622884	0.000812499	0.0574875	0.0064754	0.0178987	0.00200113	0.0656367	0.00751087	0.0476888	0.00548911
T66	0.134541	0.0151286	0.130699	0.0146559	0.166402	0.018798	0.728988	0.0815753	0.0707698	0.00805188	5.9523	0.665762	0.0920105	0.0109224	0.187202	0.0209368	0.47312	0.0529033	0.0124312	0.00141568	0.024417	0.00273938	0.0011746	0.000171384	0.00612996	0.0006994	0.183067	0.0204886	0.0062156	0.000764279	0.00447817	0.000568448	0.0280192	0.00316014	0	0	0.00232473	0.000575879	0	0	0.0075615	0.000989336	0.0127738	0.00178856
T67	0.181443	0.0203578	0.16478	0.0184628	0.238937	0.0268787	1.03052	0.115284	0.079951	0.00909143	6.95888	0.778445	0.0735381	0.00902176	0.152994	0.0171124	0.922445	0.103146	0.0198578	0.00223996	0.0203554	0.00228718	0.00292171	0.000349331	0.0122118	0.00137597	0.337953	0.0378031	0.00666052	0.000811259	0.0063634	0.000771001	0.121821	0.0136352	0.00146086	0.000383195	0.00515014	0.000792639	0	0	0.0085423	0.00112484	0.0203034	0.00255091
T68	0.463545	0.0519002	0.759404	0.084941	1.17069	0.131049	5.50798	0.615888	0.143731	0.016172	3.1649	0.35389	0.659711	0.0740448	0.502477	0.0561897	3.54366	0.396411	0.0793024	0.0088854	0.0165802	0.0018815	0.00498638	0.000585285	0.0246715	0.00277062	0.991554	0.110884	0.00805361	0.00100461	0.00274165	0.000485871	0.0142909	0.00166825	0.0031529	0.000595364	0.0246749	0.00287874	0.00527768	0.000590063	0.0254631	0.00302682	0.0157302	0.00231664
T69	0.325238	0.0364241	0.412504	0.0461515	0.807009	0.0903472	3.52556	0.394229	0.0811926	0.00923032	5.43612	0.607988	0.0988475	0.0117309	0.443191	0.0495579	1.34413	0.150307	0.0533334	0.00597926	0.043547	0.00487918	0.00301706	0.00036434	0.0176426	0.00198133	0.657139	0.0734883	0.0123682	0.00142502	0.00270478	0.000405717	0.037326	0.00419658	0.0015491	0.000363561	0.0127862	0.00152847	0.00268019	0.000299655	0.015196	0.00189351	0.0082127	0.00136362
T70	0.397222	0.0444609	0.308451	0.0345184	0.462873	0.0518816	1.94328	0.217322	0.0752231	0.00853394	4.39632	0.491644	0.0804997	0.00963371	0.267686	0.0299351	0.827699	0.0925509	0.029402	0.00330516	0.0241082	0.00270631	0.00254507	0.000307969	0.00967469	0.00109266	0.384362	0.0429913	0.00770638	0.000918775	0.00321508	0.000449547	0.0174498	0.00198538	0.00134984	0.000352947	0.00724007	0.000959616	0.00262606	0.000293602	0.00888442	0.00118061	0.0174989	0.00222292
T71	0.476709	0.0533468	0.551318	0.0616663	0.70772	0.079236	3.20873	0.358802	0.0955927	0.0107729	2.90665	0.32502	0.283137	0.0319307	0.355188	0.0397189	1.96764	0.220066	0.0435407	0.00488388	0.0276004	0.00309765	0.00382764	0.000448086	0.0166438	0.00186972	0.606199	0.0677933	0.00897872	0.00105356	0.00519044	0.000640295	0.0399984	0.00449382	0.00103317	0.000363245	0.0168259	0.00197166	0.00300111	0.000335534	0.0161863	0.00196379	0.0218441	0.00269166
T72	0.454523	0.0508611	0.456487	0.0510619	0.503089	0.0563675	2.26697	0.253508	0.094946	0.0106726	1.68074	0.187934	0.977696	0.109443	0.251127	0.0280848	1.67576	0.187405	0.0330482	0.00371085	0.0156991	0.00176907	0.00347669	0.000406898	0.0221	0.00247827	0.515709	0.0576752	0.0064083	0.000774686	0.00488602	0.000609393	0.0866962	0.00970798	0.000785692	0.000331054	0.0140934	0.00167382	0	0	0.0119573	0.00148146	0.0192249	0.00240563
T73	0.251536	0.0281745	0.278439	0.0311594	0.38632	0.0433086	1.71046	0.191287	0.0804895	0.00908488	3.03925	0.339849	0.148077	0.0169053	0.215958	0.024152	1.04895	0.117294	0.0286869	0.00322549	0.0131315	0.00148311	0.00318879	0.000374559	0.0121101	0.00136323	0.361445	0.0404286	0.00493591	0.000624915	0.00542461	0.000663383	0.0414421	0.00465419	0.00127063	0.000347976	0.0189861	0.00219585	0	0	0.0191327	0.00223146	0.012242	0.00171073
T74	0.348968	0.0390589	0.43231	0.0483556	0.322313	0.0361722	2.27937	0.254893	0.0989876	0.0111227	1.65713	0.185293	0.674082	0.0755192	0.183031	0.0204717	2.17338	0.243095	0.0272337	0.00306095	0.00924448	0.00105146	0.00321589	0.000377762	0.01064	0.00119989	0.419176	0.0468836	0.00487695	0.000629141	0.0100436	0.00116595	0.0267267	0.00301619	0.00106231	0.000358266	0.0290203	0.00331424	0	0	0.0169245	0.00197894	0.0224292	0.00276249
T75	0.169225	0.0190196	0.209447	0.0234593	0.309383	0.0347571	1.36027	0.152145	0.073032	0.00837692	9.22366	1.03222	0.125649	0.0147134	0.261433	0.029236	1.13371	0.126773	0.0244007	0.00274922	0.0313758	0.00351809	0.00193699	0.000251973	0.00942003	0.00106608	0.368101	0.0411729	0.0090652	0.00106162	0.0055655	0.000687197	0.0364309	0.00409653	0.00102075	0.000358878	0.0121274	0.00146659	0.00408299	0.000456492	0.0190539	0.00223634	0.016818	0.00218756
T76	0.262548	0.0294047	0.372242	0.0416419	0.361019	0.0404871	1.78684	0.199829	0.0910947	0.0102572	2.61745	0.292679	0.35542	0.0399521	0.200399	0.0224129	1.48093	0.16561	0.0265348	0.00298351	0.0147305	0.00166048	0.00276546	0.000329679	0.0111811	0.00126037	0.398485	0.04457	0.00572081	0.000703159	0.0047714	0.000596896	0.0297969	0.003357	0	0	0.0106383	0.00131459	0	0	0.0153366	0.00181949	0.0137786	0.00189029
T77	0.18057	0.0202657	0.241818	0.0270701	0.371991	0.0417278	1.66911	0.18667	0.0757059	0.00861378	5.89373	0.659211	0.146035	0.0167808	0.247848	0.0277176	0.964681	0.107869	0.0278509	0.00313494	0.0319437	0.00358322	0.00289891	0.000349498	0.0113728	0.00128214	0.36998	0.0413829	0.00903337	0.0010579	0.0052069	0.000640208	0.0806948	0.00903768	0.00169527	0.000388435	0.0182605	0.00212947	0	0	0.0304906	0.00348552	0.0139012	0.00189822
T78	0.241702	0.0270973	0.545115	0.0609736	0.845848	0.09468	3.60149	0.402716	0.0870243	0.00987542	5.62192	0.628789	0.0932316	0.0112032	0.441788	0.0494012	1.94301	0.217311	0.0599001	0.00671274	0.0307471	0.00344983	0.00407707	0.000474123	0.0207477	0.0023271	0.746819	0.0835154	0.00944393	0.00110869	0.00830873	0.000980575	0.0553593	0.00621011	0.00193226	0.000401264	0.019854	0.00230041	0.00507219	0.000567088	0.0331866	0.0038109	0.0184773	0.0023343
T79	0.2086	0.023405	0.210231	0.0235457	0.355702	0.0399102	1.45351	0.162571	0.0770407	0.00880919	8.72944	0.976838	0.0745942	0.0092833	0.301231	0.0336855	0.995629	0.11133	0.0380167	0.00426768	0.0217067	0.0024387	0.00343709	0.000403278	0.0137244	0.00154308	0.448165	0.0501239	0.00681182	0.000822943	0.0118247	0.00135832	0.108917	0.0121921	0.00172694	0.000387345	0.00419742	0.000688428	0.00501292	0.000560462	0.0239133	0.00276873	0.0481145	0.00551142
T80	0.184248	0.0207072	0.0986426	0.0111099	0.220005	0.0247938	0.807163	0.0903251	0	0	11.6552	1.3051	0.0527244	0.00716569	0.272322	0.030453	0.471333	0.0527036	0.018166	0.00205477	0.0196135	0.00220464	0.00226715	0.000279356	0.0097732	0.00110339	0.30398	0.034004	0.00577572	0.00070689	0.00968213	0.00112005	0.189137	0.0211592	0.00155777	0.000356929	0.00103052	0.000469698	0.00491296	0.000549286	0.0102813	0.00129625	0.0273927	0.00325498
T81	0.196448	0.0220603	0.32427	0.0362923	0.610435	0.0683705	2.41535	0.270101	0.0791118	0.00903588	8.02228	0.897587	0.0770242	0.00952884	0.346825	0.0387832	1.13058	0.126423	0.0399518	0.00448534	0.0336411	0.0037722	0.00328973	0.000390763	0.0180851	0.00203018	0.631503	0.0706214	0.00988598	0.00114846	0.0126934	0.00144808	0.111601	0.0124918	0.00139172	0.00034859	0.0073425	0.000963232	0.00659865	0.000737751	0.0277863	0.00320593	0.0687219	0.00778788
T82	0.189941	0.0213038	0.678529	0.0758834	0.656726	0.0735366	3.05101	0.341164	0.110283	0.0123925	1.98739	0.222222	0.404746	0.0454561	0.332212	0.0371501	2.59539	0.290349	0.0509937	0.00571748	0.0225682	0.00253687	0.00687088	0.000781465	0.0272755	0.00305658	0.857784	0.0959208	0.0103996	0.00120353	0.017237	0.00195205	0.11736	0.0131348	0.00186475	0.000374242	0.0140095	0.00165226	0.00865434	0.000967585	0.0337328	0.00385804	0.0307205	0.00360642
T83	0.152081	0.0171289	1.18145	0.132113	0.998552	0.111764	4.99467	0.558483	0.118169	0.0133351	5.83771	0.652949	0.26863	0.0304473	0.372391	0.0416428	3.66819	0.410598	0.0730398	0.0081814	0.0103832	0.00119007	0.00669194	0.000762155	0.0265606	0.00297729	1.04268	0.116594	0.00978786	0.00113727	0.00773979	0.000911303	0.0695152	0.00778812	0.00140507	0.000347167	0.0257676	0.00293705	0.00740639	0.000828059	0.0442954	0.00502604	0.00447717	0.0010761
T84	0.163205	0.0183203	0.289847	0.0324342	0.380591	0.042681	1.60095	0.179043	0.0877757	0.00991309	4.15136	0.464245	0.146491	0.0168129	0.279662	0.0312744	1.04467	0.116815	0.0298679	0.00335828	0.0242885	0.00272806	0.00405283	0.000472224	0.0169521	0.0019041	0.488571	0.0546409	0.00797745	0.000943802	0.0106603	0.00122544	0.0839531	0.00940212	0.00111589	0.000355036	0.00676659	0.00090605	0.00424989	0.000475152	0.0231963	0.00268327	0.021107	0.00260031
T85	0.311192	0.0348416	0.226906	0.0254001	0.26449	0.0297079	1.06034	0.118603	0.0790147	0.00893011	4.01793	0.449319	0.146016	0.016709	0.161448	0.0180574	0.768945	0.085981	0.0482208	0.00540462	0.00874433	0.000999722	0.001567	0.000209001	0.00868022	0.000983816	0.273607	0.0306089	0.00287283	0.000429345	0.00489094	0.000616594	0.221873	0.0248186	0.000807242	0.000344429	0.00617303	0.000851423	0.00258792	0.000289339	0.0146016	0.00176267	0.0118712	0.00168905
T86	0.129657	0.0145824	0.227952	0.025519	0.439207	0.0492328	1.8389	0.20565	0.0744073	0.00845558	5.33268	0.596428	0.09295	0.010981	0.197489	0.0220867	0.950077	0.106236	0.0347203	0.00389802	0.0101015	0.00114798	0.00214282	0.000263121	0.00897571	0.00101452	0.425654	0.0476069	0.00390248	0.000520499	0.00797052	0.000935237	0.0655144	0.00734155	0.000922405	0.000324302	0.00702447	0.000929236	0.00250705	0.000280297	0.0207186	0.00240282	0.00707177	0.0012696
